# Supplementary material for: Impact of Reducing Intake of Red and Processed Meat on Colorectal Cancer Incidence in Germany 2020 to 2050—A Simulation Study
Source: MDPI journal article supplement (doi:10.3390/nu15041020), 2023-02-17

### Reduced or eliminated red meat intake among men

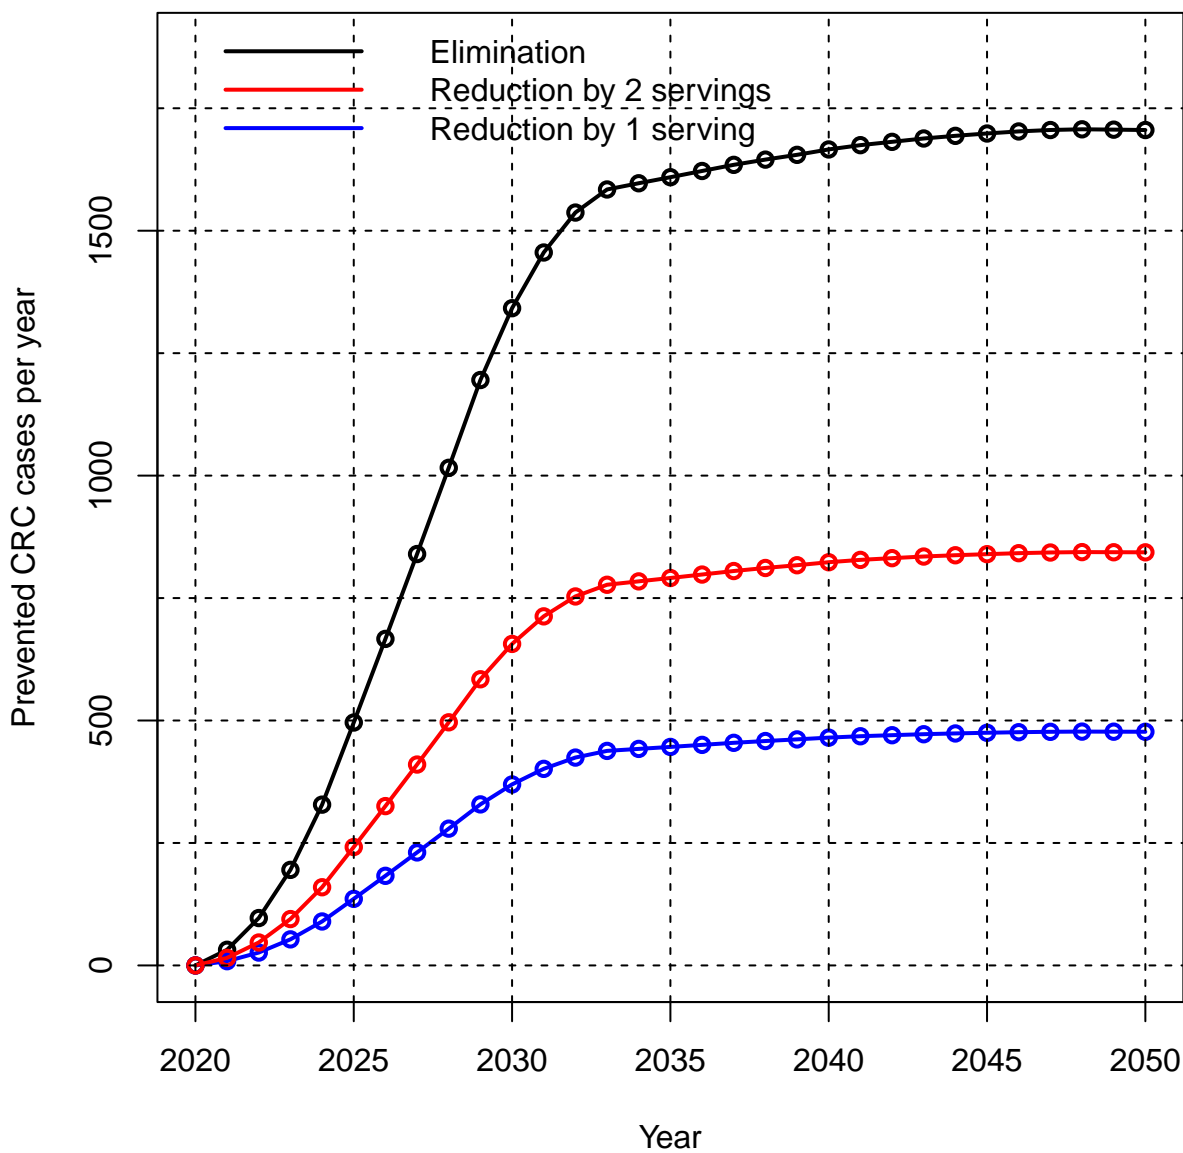

### Reduced or eliminated red meat intake among women

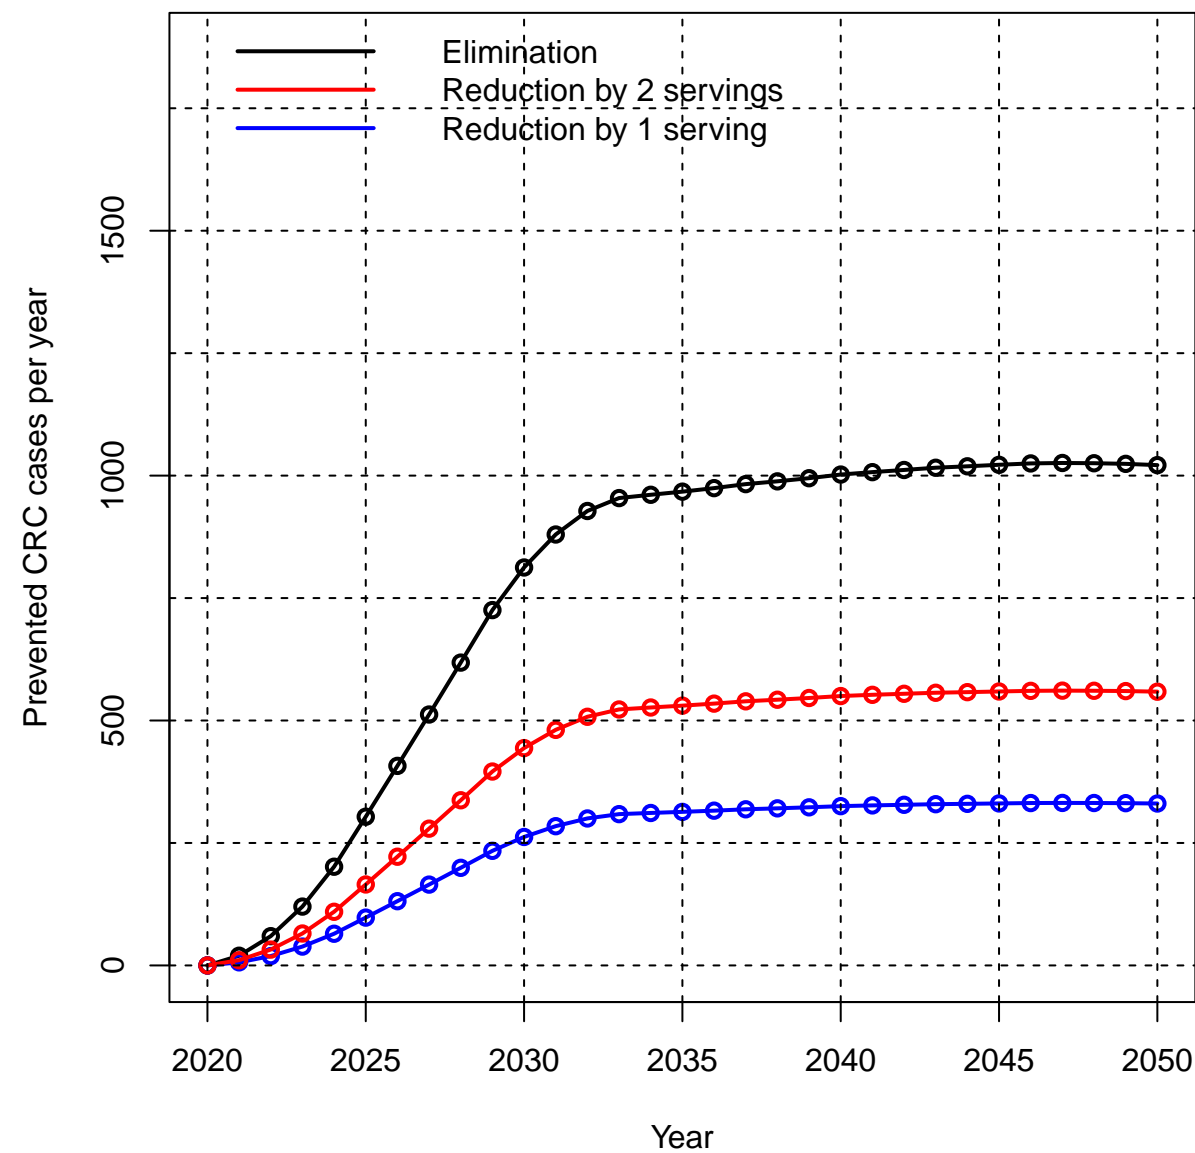

Supplement: s1 [file s1]
